1 **Title:** Trophic complexity alters the diversity-multifunctionality relationship in experimental  
2 grassland mesocosms

3

4 **Authors:** Krishna Anujan\*<sup>1</sup>, Sebastian A. Heilpern<sup>1</sup>, Case M. Prager<sup>1,2</sup>, Brian C. Weeks<sup>1,3</sup> and  
5 Shahid Naeem<sup>1</sup>

6 1. Columbia University, Department of Ecology, Evolution and Environmental Biology, 10<sup>th</sup>  
7 Floor Schermerhorn Ext, 1200 Amsterdam Avenue, New York, NY 10027

8 2. University of Vermont, Rubenstein School of Environment and Natural Resources, Aiken  
9 Center, 81 Carrigan Drive, Burlington, Vermont 05405

10 3. University of Michigan, Ecology and Evolutionary Biology, 1105 N University Ave,  
11 Biological Sciences Building 2020C, Ann Arbor, MI 48109

12

13 **Content type:** Research article

14

15 **Keywords:** Biodiversity, ecosystem function, multifunctionality, trophic complexity,  
16 biodiversity loss, trophic simplification, jack-of-all-trades effect

17

18 **Abstract**

19 Changes in diversity can differentially influence multiple ecosystem functions. This diversity-  
20 multifunctionality relationship has been documented in experimental studies but the primary  
21 focus has been on plant diversity, or a single trophic level. Ecosystems, however, are trophically  
22 complex and it remains unclear if positive diversity-multifunctionality relationships found in  
23 single-trophic level experiments hold with trophic complexity. To address this concern, we

24 simultaneously manipulated plant diversity and four levels of trophic complexity; (1) plants-  
25 only, (2) plants and aboveground mesofauna, (3) plants and belowground mesofauna, and (4)  
26 plants and both above- and below-ground mesofauna, in a multifactorial experiment using tall-  
27 grass prairie mesocosms established in Cedar Creek, Minnesota, USA. We found that trophic  
28 complexity altered both the magnitude and direction of the diversity-multifunctionality  
29 relationship. These findings suggest that the adverse consequences to ecosystem  
30 multifunctionality attributable to plant diversity loss may be exacerbated with concurrent  
31 declines in trophic complexity, an increasingly common feature of terrestrial systems.

32

### 33 **Introduction**

34 Increasing biodiversity within a trophic level, both along experimental and naturally occurring  
35 gradients, is associated with a positive and saturating increase in the magnitude of ecosystem  
36 functions when considered individually and a monotonic increase in the number of functions  
37 maintained simultaneously<sup>1-5</sup>. Empirical support for this diversity-multifunctionality  
38 relationship, across taxa and habitats, suggests that higher levels of biodiversity may be  
39 necessary to maintain ecosystem functioning than previously assumed based on single-function  
40 studies<sup>2,6,7</sup>.

41

42 The multifunctionality of ecosystems has been shown to be sensitive to two key factors: (1) the  
43 levels of biodiversity<sup>4,7</sup> and (2) a “threshold” of ecosystem functions selected for analysis or a  
44 discerning magnitude of each ecosystem function, scaled from zero to 100%, above which a  
45 community is considered to maintain that particular function and contribute to  
46 multifunctionality<sup>7-9</sup>. When low thresholds are selected (e.g., obtaining at least 10% of every

47 function measured), the number of functions maintained above the selected threshold increases  
48 with diversity, resulting in a positive diversity-multifunctionality relationship. The strength, or  
49 slope, of this relationship, increases with the selected threshold until moderate threshold values  
50 are reached, then the magnitude of the relationship decreases and switches to a negative  
51 biodiversity-multifunctionality relationship at high thresholds. This pattern of changes in the  
52 diversity-multifunctionality relationship is referred to as the “jack-of-all-trades” effect<sup>8</sup> (Fig 1).  
53 This jack-of-all-trades effect occurs due to physiological trade-offs that limit the potential of any  
54 species to maximise all functions simultaneously. In effect, community average values for  
55 functions are low in diverse communities compared to high-functioning monocultures, allowing  
56 them to maintain most functions, but only at the average value contributed by each species.  
57 Consequently, as one increases the selected function threshold (e.g., obtaining over 80% of every  
58 function measured), the diversity-multifunctionality relationship becomes negative because the  
59 community average for many functions are likely to be lower than this threshold.

60

61 Most diversity-function studies have focused on a single trophic level, often the plant or  
62 producer community, but changes in diversity of non-producer trophic levels can also have  
63 significant impacts on ecosystem functions<sup>10-16</sup>. The number of trophic levels, or trophic  
64 complexity, can thus potentially impact the diversity-multifunctionality relationship, but this  
65 effect is poorly understood. In grassland communities, for example, the presence of multiple  
66 trophic levels was shown to decrease the effect of biodiversity on a single ecosystem function  
67 over a long term experiment<sup>17</sup>, while an observational study showed the opposite effect<sup>18</sup>.  
68 Current studies, however, do not allow for a direct comparison of ecosystems that vary in trophic

69 complexity because such explorations would require simultaneously manipulating plant diversity  
70 as well as the number of non-producer trophic groups.

71

72 Here, we explore the effects of diversity and trophic complexity on ecosystem multifunctionality  
73 using an experimental approach. We hypothesise that plant diversity would increase

74 multifunctionality until moderate thresholds and decrease multifunctionality at high thresholds,

75 resulting in a jack-of-all-trades relationship. Further, we hypothesise that trophic complexity

76 could have impacts on multifunctionality at two different levels; (1) altered diversity-function

77 relationships for single functions, which aggregates to multifunctionality effects and (2) altered

78 correlations between measured functions from communities with plants only, which shifts the

79 threshold at which the diversity-multifunctionality effect switches from positive to negative.

80 Each of these effects can be measured on the jack-off-all-trades curve, or the relationship

81 between the strength (slope) of the diversity-multifunctionality effect (DME) and the selected

82 threshold for measuring multifunctionality. Based on the hypotheses, we expected two

83 corresponding effects of trophic complexity to this curve: (1) a change in the magnitude of the

84 DME across thresholds, resulting in either a taller or flatter curve, and (2) a change in the

85 threshold at which DME shifts from positive to negative effect measured along the horizontal

86 location on the x-axis. Figure 1 provides a conceptual framework for these predicted outcomes.

87 We note that these predicted responses to trophic complexity are not mutually exclusive; the

88 curve flatness, shift location, both, or neither may respond to differences in trophic complexity.

89

90 To test this framework, we simultaneously manipulated tall-grass prairie plant diversity and

91 trophic complexity in 94 tall-grass prairie mesocosms at Cedar Creek, Minnesota, USA. In these

92 mesocosms, we varied plant diversity from 1 to 16 species, following a standard, stratified log<sub>2</sub>  
93 randomised design. We simultaneously varied trophic complexity following a factorial design  
94 resulting in 4 trophic treatments; above-ground insect-dominated mesofaunal communities only  
95 (INS), below-ground litter mesofaunal communities only (LIT), both above- and below-ground  
96 mesofauna (BOTH) or all mesofauna excluded (NONE). For comparison, we pooled all the data  
97 (POOLED).

98

99 We measured four ecosystem functions; aboveground biomass, belowground biomass, soil water  
100 retention and biomass recovery after harvest. We calculated the mean values of these functions  
101 across the different plant diversity and trophic complexity treatments. We standardised the  
102 values of each of the functions between 0 and 100 for the entire dataset and calculated a  
103 combined multifunctionality metric, the number of functions maintained above a given threshold  
104 for each community across this range of thresholds following the standard approach<sup>4,8</sup>. We then  
105 analysed the diversity-multifunctionality effect (the DME) as the slope of the linear fit of the  
106 number of functions maintained above the threshold against plant diversity. Finally, we tested  
107 whether this relationship was sensitive to trophic complexity.

108

## 109 **Results**

110 For every function measured, communities on average, independent of diversity and trophic  
111 complexity treatments, had low percent function values; most communities failed to maintain  
112 functions at high values (Fig 2). The average values of each function remained within a small  
113 range of values across different plant diversity treatments, between 25 and 50% of the maximum  
114 value for each function Fig S1). Trophic complexity did not alter the curves substantially for any

115 single function, although there were some differences at high threshold values for water retention  
116 and biomass recovery (Fig 2) and at high diversity treatments for water retention and  
117 aboveground biomass (Fig S1).

118

119 Ecosystem multifunctionality showed the predicted pattern to changes in plant biodiversity, with  
120 positive effects at low thresholds and negative effects at high thresholds (Fig. 3). The plant  
121 diversity-multifunctionality relationship for the pooled dataset was positive for a threshold of  
122 25% (slope=0.03, p=0.36) and 50% (slope=0.007, p=0.81) but was negative for 75% (slope=-  
123 0.14, p=0.4) and 90% thresholds (slope=-0.11, p=0.36) (Fig 3). At the 90% threshold, most plots  
124 had no functions above cutoff, making a biodiversity or trophic effect less discernible, while  
125 most plots had a large number of functions above the 25% threshold even without the effect of  
126 plant diversity or trophic structure. The biodiversity effect on multifunctionality was most  
127 observable at moderate thresholds. Similarly, the effect of trophic complexity was significant  
128 only at 75% (-0.12, p<0.05) and marginally significant at 90% (-0.07, p=0.06) while at a 25%  
129 threshold (-0.05, p=0.59) and 50% threshold (-0.14, p=0.16), these differences were not  
130 detectable.

131

132 The diversity-multifunctionality effect (DME) is sensitive to trophic complexity. In the pooled  
133 dataset, where all treatments were taken together, the DME increased and peaked at moderate  
134 thresholds, switching to negative effect at high thresholds, following predictions of the jack-of-  
135 all-trades effect (Fig 4). Trophic complexity had an effect on both the height and location of the  
136 peak DME (Fig 4). Comparing the curves of the four different treatments, we found that the  
137 addition of either the above-ground (INS) or litter (LIT) trophic level led to higher peak DMEs

138 than the plant-only or full-complexity (BOTH, i.e., plants, litter, and above-ground fauna)  
139 communities, but all treatments peaked at similar intermediate thresholds (~ 35- 40%). The  
140 transition from positive to negative DMEs occurred between ~ 40 – 60% thresholds for all  
141 trophic treatments except the full complexity treatment. Finally, the full trophic complexity  
142 treatment was the most distinct of the four treatments, having the lowest peak (at ~10%  
143 threshold) with DME values that were consistently lower in magnitude. This treatment also  
144 showed the earliest switch to negative values, at roughly 20% function threshold, remaining  
145 largely negative across most threshold values.

146

## 147 **Discussion**

148 In agreement with recent literature<sup>7,8</sup>, our results show that biodiversity is necessary for  
149 maintaining multiple functions from low to moderate function threshold values in grassland  
150 communities but at higher thresholds, increases in diversity are inversely associated with  
151 multifunctionality (i.e., the jack-of-all-trades effect) (Figs 3-4). Our findings are therefore  
152 consistent with what has been observed across different taxa and habitats<sup>7</sup>.

153

154 Our findings also point to the sensitivity of the jack-of-all-trades pattern to trophic complexity.  
155 Although the bottom-up effect of plant diversity on herbivore diversity, and potentially  
156 ecosystem functions, has been observed in long-term experimental data<sup>17,19-21</sup>, our study tests the  
157 top-down (aboveground fauna) and donor-controlled (litter fauna) effects of trophic complexity  
158 on multifunctionality. The simultaneous presence of aboveground and litter fauna trophic levels,  
159 the condition closest to natural systems where trophic complexity is common, showed a switch  
160 to negative diversity-multifunctionality effects (DMEs) at a very low threshold and maintained

161 persistent negative DMEs throughout most thresholds values (Fig. 4). Any reduction in trophic  
162 complexity altered the diversity-multifunctionality relationship. Thus, both the location and  
163 height of peak DMEs are affected by trophic complexity, as suggested in our conceptual  
164 framework (Fig. 1).

165

166 The magnitude and direction of the trophic impact on DME depends on the trophic component  
167 considered. When examined across thresholds, both aboveground and litter fauna amplified the  
168 DME at low thresholds but at high thresholds, only aboveground fauna amplified the effect. This  
169 suggests that the presence of aboveground arthropods increases the contribution of biodiversity  
170 in providing ecosystem multifunctionality at moderate thresholds. This could be because plant  
171 diversity is known to decrease associational effects to herbivory damage<sup>22, 23</sup> leading to an  
172 additional advantage of diversity in the presence of aboveground fauna.

173

174 In contrast to what we observed for multifunctionality, our analyses did not reveal impacts of  
175 trophic complexity on any single ecosystem function when aggregated across plant diversity  
176 treatments (Figs. 2-3). Further we did not observe any impacts of the trophic complexity  
177 treatments on average ecosystem function value at any level of plant diversity (Fig S1). Although  
178 the treatment with plants alone performed better at water retention along all thresholds (Fig. 2)  
179 and intermediate diversities (Fig S1), this observation alone cannot explain the differences  
180 between the treatments.

181

182 Despite the lack of significant effects of trophic complexity on single ecosystem functions, we  
183 observed trophic complexity effects when these functions were aggregated to examine



184 multifunctionality. Our results also show that the presence of multiple trophic components  
185 decreases the magnitude of the DME across all thresholds, consistent with results from a long-  
186 term experiment from the same region demonstrating that non-producer trophic components  
187 obscure the diversity-productivity relationship due to a loss in complementarity effects with the  
188 addition of herbivores<sup>17</sup>. As the plants we used were taxonomically and functionally quite  
189 distinct, identity effects<sup>24</sup>, or unique contributions of individual species to the ecosystem  
190 functions considered, are also likely to be responsible for the nature of the biodiversity-  
191 multifunctionality relationship we observed.

192

193 Our findings have important implications for understanding the relationship between biodiversity  
194 and ecosystem functions. Plant diversity is currently understood to be critical to sustaining  
195 multifunctionality at, or below, moderate function threshold values, but our results show that  
196 such effects are influenced by trophic complexity. Given that declines in trophic complexity are  
197 widespread, occurring, for example, where agriculture leads to habitat simplification through the  
198 use of biocides and where trophic downgrading is occurring in terrestrial and marine habitats,  
199 most ecosystems are experiencing declines in both producer diversity and trophic complexity.  
200 Sustaining a broad spectrum of ecosystem functions and the services they provide will require  
201 more plant diversity in the face of widespread trends in trophic simplification.

202

## 203 **Methods**

### 204 **Experimental Methods**

205 We used data from a year-long experiment on grassland mesocosms in a tall-grass prairie, part of  
206 the Cedar Creek Ecosystem Science Reserve, Minnesota. The experimental design was factorial

207 with 100 pots, 1m in diameter, grown inside netted insect enclosures. Each pot was maintained at  
208 one of 5 levels of plant diversity: 1, 2, 4, 8 or 16 species. The species used in this experiment  
209 (Table S1) were native perennial species used in other experimental studies from the site<sup>17,25,26</sup>.  
210 Pots with incomplete data on species identity were excluded from this analysis, resulting in a  
211 sample size of 94. The plant diversity treatments were crossed with trophic complexity  
212 treatments: plants and aboveground mesofauna (primarily insects and other invertebrates, INS),  
213 plants and litter mesofauna (LIT), plants and both aboveground and litter mesofauna (BOTH), or  
214 plants only (i.e., no aboveground or litter fauna, NONE). These treatments were achieved by first  
215 applying a pesticide treatment on all the pots and removing all aboveground and litter fauna.  
216 25% of the pots in each treatment were allowed to be recolonised by aboveground fauna only,  
217 25% by litter fauna only, 25% by both aboveground and litter fauna, and 25% were plants only,  
218 leading to the four community complexity treatments. The experiment was run for a year from  
219 July 2000 to July 2001 when final biomass and soil water retention were measured and biomass  
220 recovered in each pot after harvest was measured a year later.

221

## 222 **Ecosystem function measurements**

223 Four candidate ecosystem functions were analysed: (i) Aboveground biomass: the total  
224 aboveground biomass in each pot was measured in 2001, after one year of experiment. (ii)  
225 Belowground biomass: the total belowground biomass in each pot was measured after one year  
226 of experiment (iii) Water retention: the time taken for a fixed volume of water to flow into a  
227 collection flask at the bottom of the pot was measured at the end of one year of experiment (iv)  
228 Biomass recovery: the biomass recovered one year post harvest was measured to quantify biotic  
229 control over ecosystem resilience. Recovery was calculated as the ratio of the total recovered

230 biomass to the biomass prior to disturbance (aboveground and belowground biomass). A  
231 principal component analysis of functions to test correlations resulted in water retention close to  
232 PC1 and aboveground biomass close to PC2 and the vector of biomass post-harvest was in a  
233 similar direction as the biomass in the previous year.

234

235 For each function, the decay curves for each trophic treatment was plotted along a standardised  
236 range of threshold values. These were visually examined for differences.

237

### 238 **Multifunctionality**

239 To assess multifunctionality across diversity treatments, measurements of four ecosystem  
240 functions – aboveground biomass, belowground biomass, water retention and biomass recovery  
241 after harvest - were chosen and analysed using published methodology of the threshold  
242 approach<sup>18</sup>. To this end, the maximum value for each ecosystem function was calculated as the  
243 mean of the five highest function values in the entire experiment. Each ecosystem function in a  
244 pot was then standardised between this maximum and the minimum value in the experiment. For  
245 every 5% between 0 and 100, each pot was scored for the number of functions maintained above  
246 that threshold. For each threshold, the slope of linear model between the number of functions  
247 maintained above threshold and the manipulated plant diversity in the community was defined as  
248 the diversity effect on multifunctionality (DME). DME was analysed for the pooled dataset as  
249 well as the dataset split into the four community complexity treatments. The magnitude of the  
250 peak and the point at which the curve of biodiversity effect vs. threshold crosses the x-axis for  
251 each of the treatments were examined in comparison with the pooled data for reasons described  
252 in the introduction.

253

## 254 **References**

- 255 1. Liang, J. *et al.* Positive biodiversity–productivity relationship predominant in global  
256 forests. *Science* (80-. ). (2016). doi:10.1126/science.aaf8957
- 257 2. Hooper, D. U. *et al.* Effects of biodiversity on ecosystem functioning: a consensus of  
258 current knowledge. *Ecol. Monogr.* **75**, 3–35 (2005).
- 259 3. Emmett Duffy, J., Godwin, C. M. & Cardinale, B. J. Biodiversity effects in the wild are  
260 common and as strong as key drivers of productivity. *Nature* **549**, 261–264 (2017).
- 261 4. Hector, A. & Bagchi, R. Biodiversity and ecosystem multifunctionality. *Nature* **448**, 188–  
262 190 (2007).
- 263 5. Zavaleta, E. S., Pasari, J. R., Hulvey, K. B. & Tilman, G. D. Sustaining multiple  
264 ecosystem functions in grassland communities requires higher biodiversity. *Proc. Natl.*  
265 *Acad. Sci.* **107**, 1443–1446 (2010).
- 266 6. Cardinale, B. J. *et al.* Biodiversity loss and its impact on humanity. *Nature* **489**, 326–326  
267 (2012).
- 268 7. Lefcheck, J. S. *et al.* Biodiversity enhances ecosystem multifunctionality across trophic  
269 levels and habitats. *Nat. Commun.* **6**, 6936 (2015).
- 270 8. van der Plas, F. *et al.* Jack-of-all-trades effects drive biodiversity–ecosystem  
271 multifunctionality relationships in European forests. *Nat. Commun.* **7**, 11109 (2016).
- 272 9. Manning, P. *et al.* Redefining ecosystem multifunctionality. *Nat. Ecol. Evol.* **2**, 427–436  
273 (2018).
- 274 10. Naeem, S., Thompson, L., Lawler, S. P., Hawton, J. H. & Woodfin, R. M. Declining  
275 biodiversity can alter the performance of ecosystems. *Nature* **368**, (1994).
- 276 11. Naeem, S., Thompson, L., Lawton, J. H., Woodfin, R. M. & Lawler, P. Empirical  
277 evidence that declining species diversity may alter the performance of terrestrial  
278 ecosystems. *Philos. Trans. R. Soc. B* **347**, (1995).
- 279 12. Strickland, M. S., Hawlena, D., Reese, A., Bradford, M. a & Schmitz, O. J. Trophic  
280 cascade alters ecosystem carbon exchange. *Proc. Natl. Acad. Sci. U. S. A.* **110**, 11035–8  
281 (2013).
- 282 13. Schmitz, O. J. Predators have large effects on ecosystem properties by changing plant  
283 diversity, not plant biomass. *Ecology* **87**, 1432–1437 (2006).

- 284 14. Tiffin, P. & Ross-Ibarra, J. Multitrophic Functional Diversity Predicts Ecosystem  
285 Functioning in Experimental. *PeerJ PrePrints* **96**, 1–20 (2014).
- 286 15. Estes, J. A. *et al.* Trophic Downgrading of Planet Earth. *Science (80-. )*. **333**, (2011).
- 287 16. Dyer, L. A. & Letourneau, D. Top-down and bottom-up diversity cascades in detrital vs .  
288 living food webs. *Ecol. Lett.* **6**, 60–68 (2003).
- 289 17. Seabloom, E. W. *et al.* Food webs obscure the strength of plant diversity effects on  
290 primary productivity. *Ecol. Lett.* **20**, 505–512 (2017).
- 291 18. Soliveres, S. *et al.* Biodiversity at multiple trophic levels is needed for ecosystem  
292 multifunctionality. *Nature* **536**, 456–459 (2016).
- 293 19. Haddad, N. M. *et al.* Plant species loss decreases arthropod diversity and shifts trophic  
294 structure. *Ecol. Lett.* **12**, 1029–1039 (2009).
- 295 20. Connor, M. I. O. *et al.* A general biodiversity – function relationship is mediated by  
296 trophic level. *Oikos* 18–31 (2017). doi:10.1111/oik.03652
- 297 21. Scherber, C. *et al.* Bottom-up effects of plant diversity on multitrophic interactions in a  
298 biodiversity experiment. *Nature* **468**, 553–556 (2010).
- 299 22. Baraza, E., Zamora, R. & Hódar, J. A. Conditional outcomes in plant-herbivore  
300 interactions: Neighbours matter. *Oikos* **113**, 148–156 (2006).
- 301 23. Hambäck, P. A., Inouye, B. D., Andersson, P. & Underwood, N. Effects of plant  
302 neighborhoods on plant-herbivore interactions: Resource dilution and associational  
303 effects. *Ecology* **95**, 1370–1383 (2014).
- 304 24. Meyer, S. T. *et al.* Biodiversity-multifunctionality relationships depend on identity and  
305 number of measured functions. *Nat. Ecol. Evol.* **2**, 44–49 (2018).
- 306
- 307 25. Tilman, D., *et al.* Diversity and productivity in a long-term grassland experiment. *Science*  
308 **294**, 843–845 (2001).
- 309
- 310 26. Tilman, D., Reich, P.B. & Knops, J.M.H. Biodiversity and ecosystem stability in a  
311 decade-long grassland experiment. *Nature* **441**, 629–632 (2006).
- 312
- 313

314 Tables and Figures

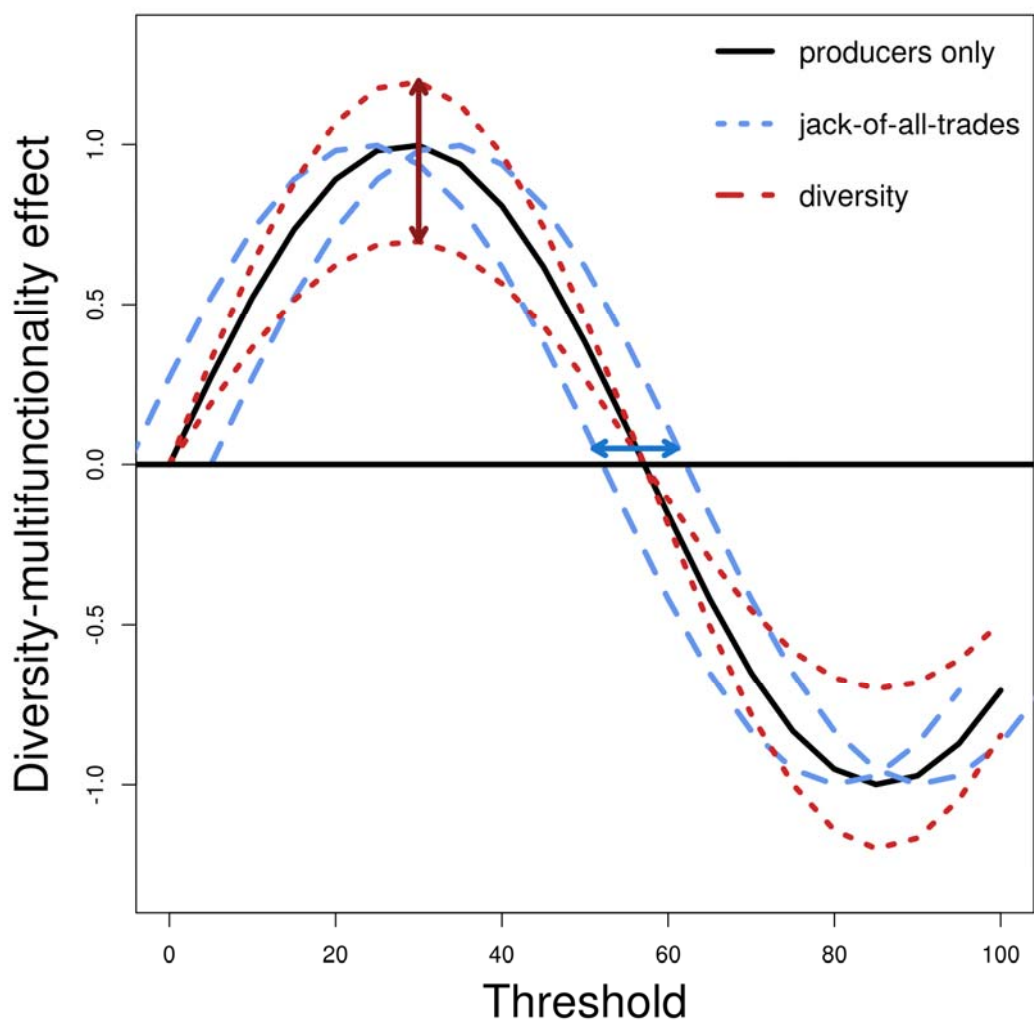

315

316 Figure 1. Conceptual framework illustrating hypothesised effects of trophic complexity on the  
317 diversity-multifunctionality effect (DME) curve. The DME is a measure of the slope of the  
318 relationship between diversity and multifunctionality (e.g., number of functions gained through  
319 the addition of species) whose value is dependent on the threshold (i.e., percent ecosystem  
320 function obtained) used in estimating multifunctionality. Positive effects of diversity correspond  
321 to positive DME values, or a curve above zero and vice versa. The continuous black curve  
322 represents a hypothetical relationship between selected threshold value and DME for a plant  
323 community in the absence of trophic complexity (i.e., the plant only curve). The red and blue  
324 lines represent possible deviations from the plant-only curve with the addition of trophic  
325 complexity. The red curves represent trophic-induced changes to diversity effects on single  
326 ecosystem functions, which alter the flatness of the DME curve. The blue curves represent  
327 trophic-induced changes to correlations between traits or altered “jack-of-all-trades” effect,  
328 which shifts the horizontal location of the DME switch from positive to negative.

329

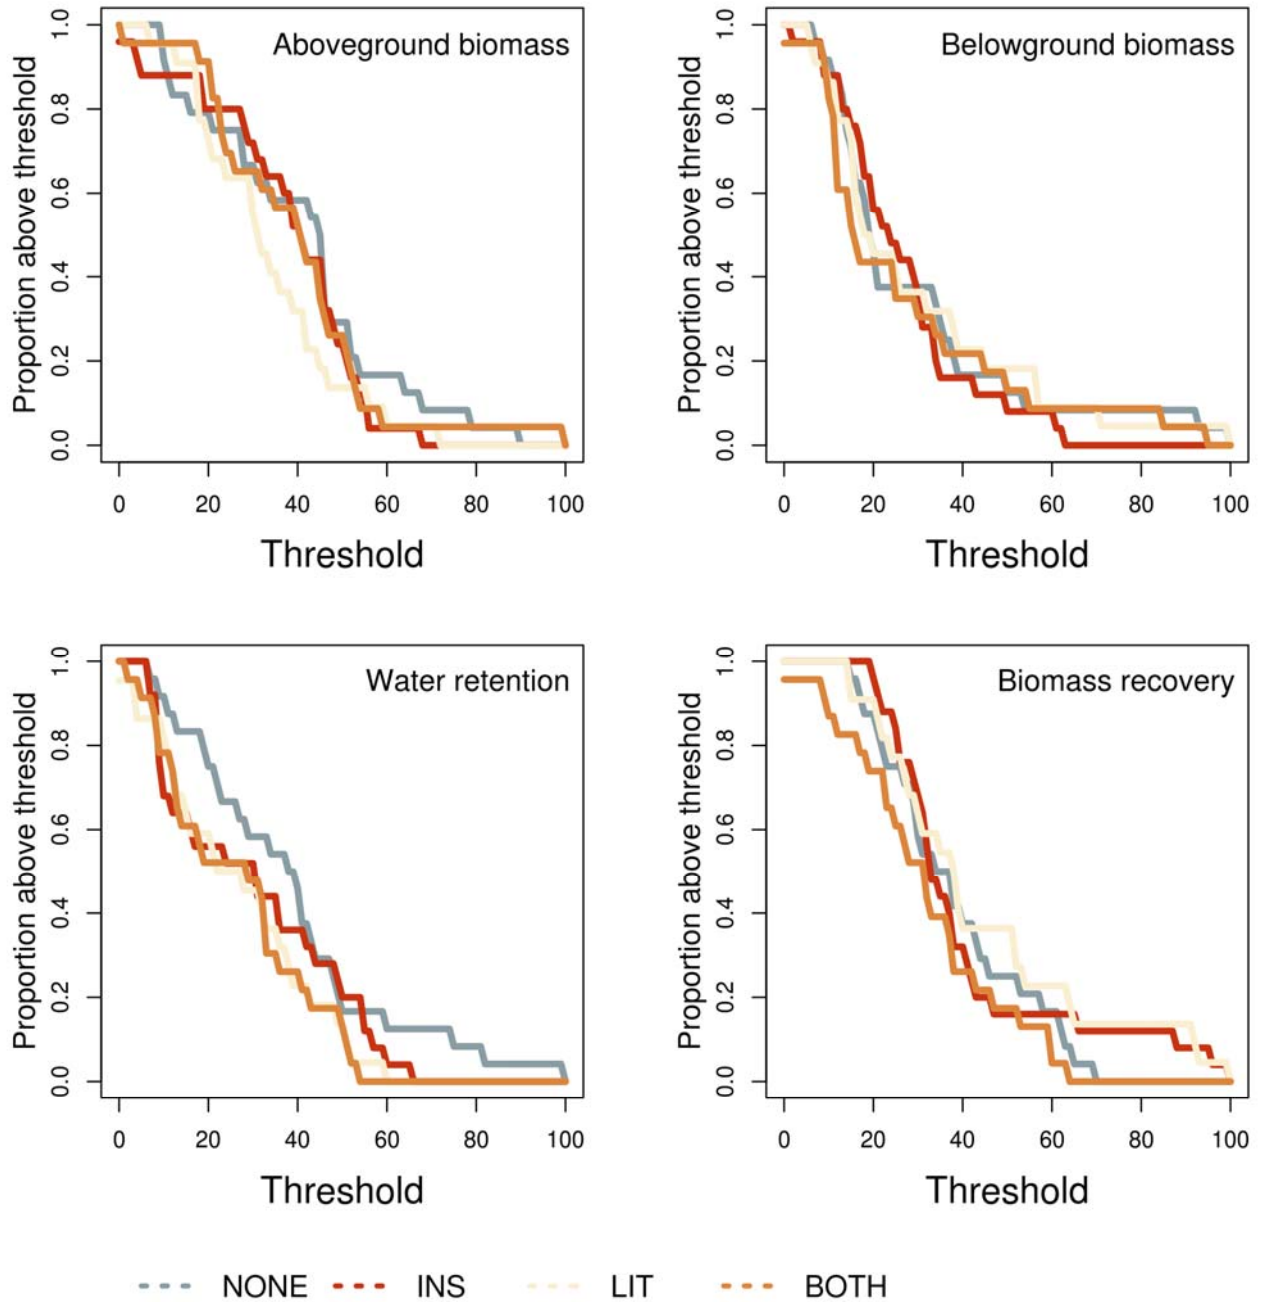

330

331 Figure 2: Proportion of communities maintaining single ecosystem functions along a range of

332 percent thresholds. Panels represent the four functions – aboveground biomass, flow time,

333 biomass recovery and belowground biomass. Coloured curves represent the four trophic

334 treatments.



335

336

337

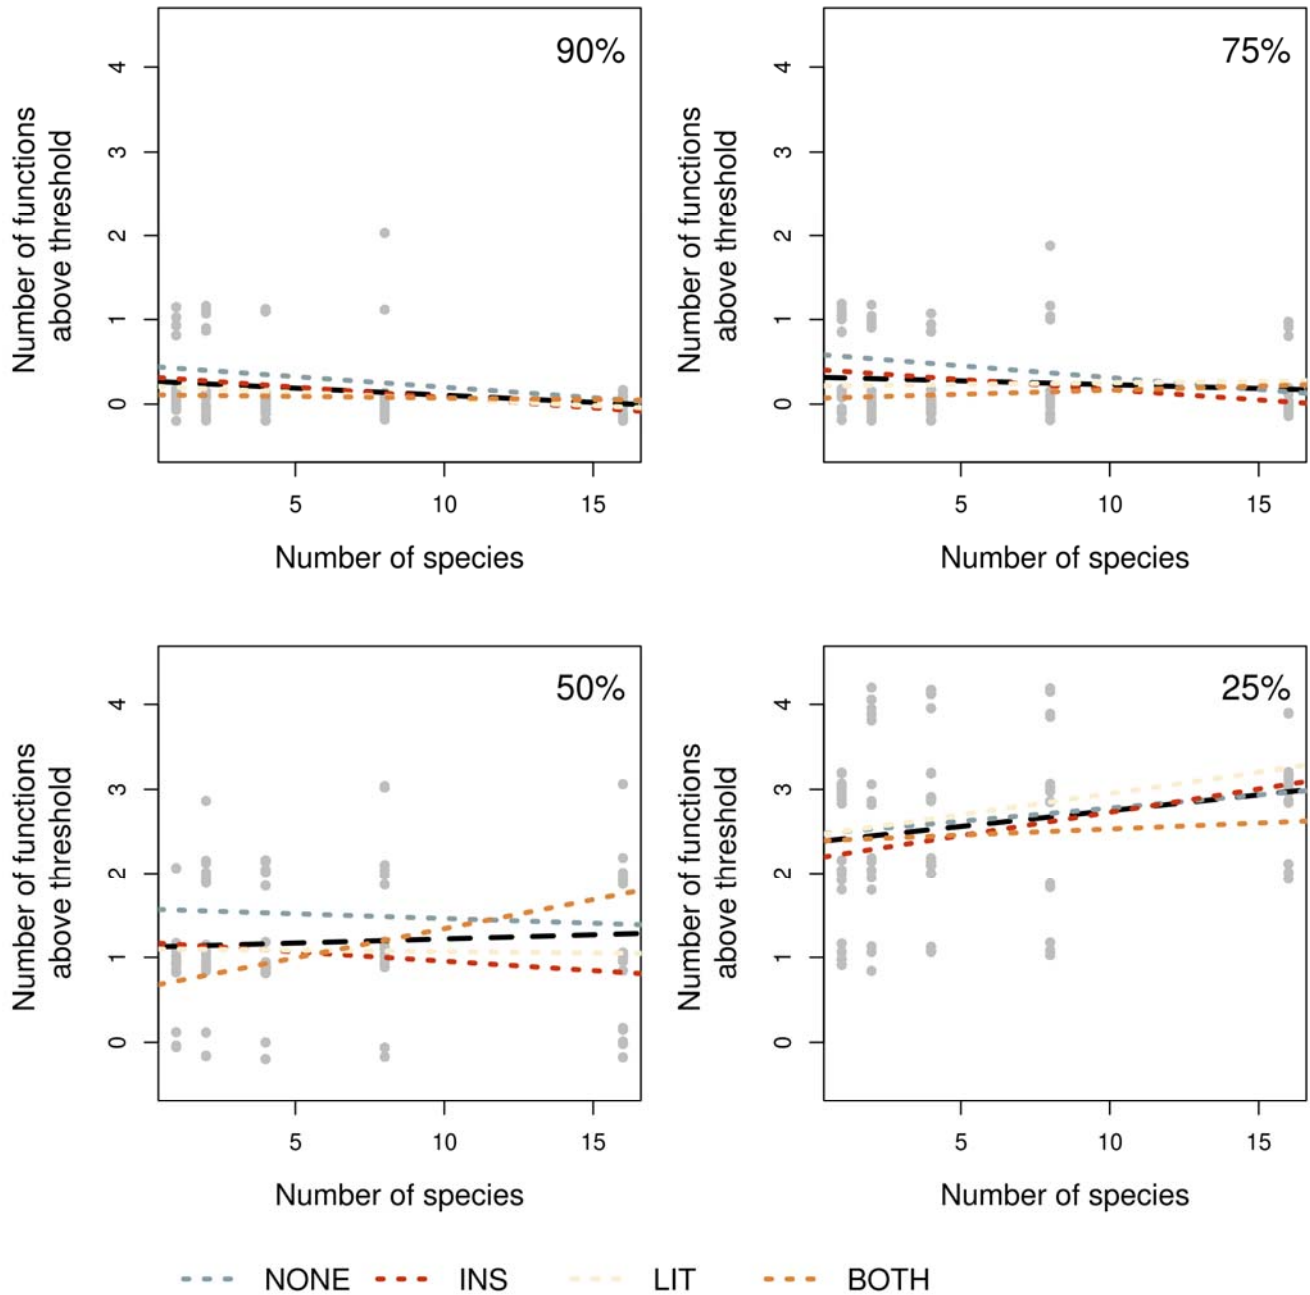

338 Figure 3. Number of functions above four different thresholds, indicated in the top right corner

339 of each panel, against the number of species in the plot. Lines represent linear model fits for

340 pooled data (black) as well as each treatment (colours). Legend shows colour codes for  
341 treatments. Actual data points for each plot represented as grey dots.  
342

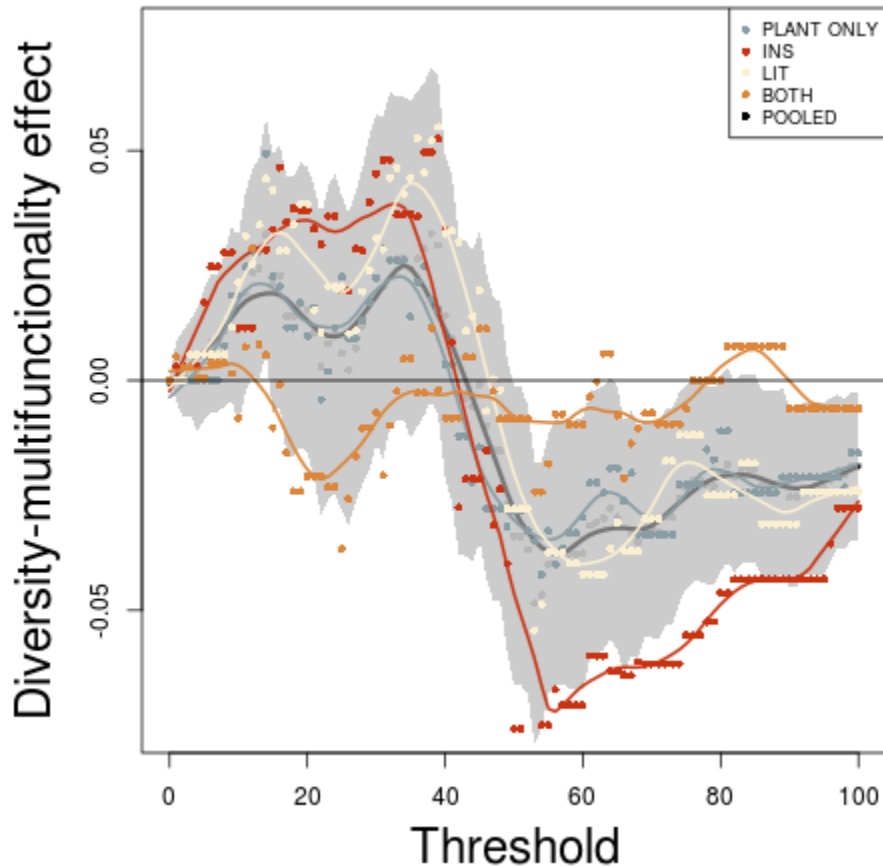

343  
344 Figure 4. Effect of threshold on the biodiversity-multifunctionality effect (the DME). Each point  
345 represents the slope of the linear model between plant species richness and number of functions  
346 above the threshold. Each DME curve for each level of trophic complexity is plotted using a  
347 different colour, as presented in the key (top right), with the curve for the pooled dataset  
348 presented in black. The curves are smooth-spline interpolations. The grey polygon represents the  
349 bounds of the standard error of the slope in the pooled dataset.  
350
